# Supplementary material for: Facile synthesis of self-assembled spherical and mesoporous dandelion capsules of ZnO: efficient carrier for DNA and anti-cancer drugs
Source: Royal Society of Chemistry journal article supplement (doi:10.1039/c4tb00416g), 2014-01-01
Supplement: c4tb00416g1.pdf [file c4tb00416g1.pdf]

Supporting Information:

**Facile Synthesis of Self-Assembled Spherical and mesoporous  
Dandelion Capsules of ZnO: Efficient Carrier for DNA and Anti-  
cancer Drugs**

*V. B. Kumar<sup>a</sup>, Koushi Kumara, Aharon Gedanken<sup>b</sup> and Pradip Paik<sup>a\*</sup>*

[\*] Prof. P. Paik\*

School of Engineering Sciences and Technology

University of Hyderabad, Hyderabad 500046, India

E-mail: [ppse@uohyd.ernet.in](mailto:ppse@uohyd.ernet.in), [paik@uohyd.ac.in](mailto:paik@uohyd.ac.in), [pradip.paik@gmail.com](mailto:pradip.paik@gmail.com)

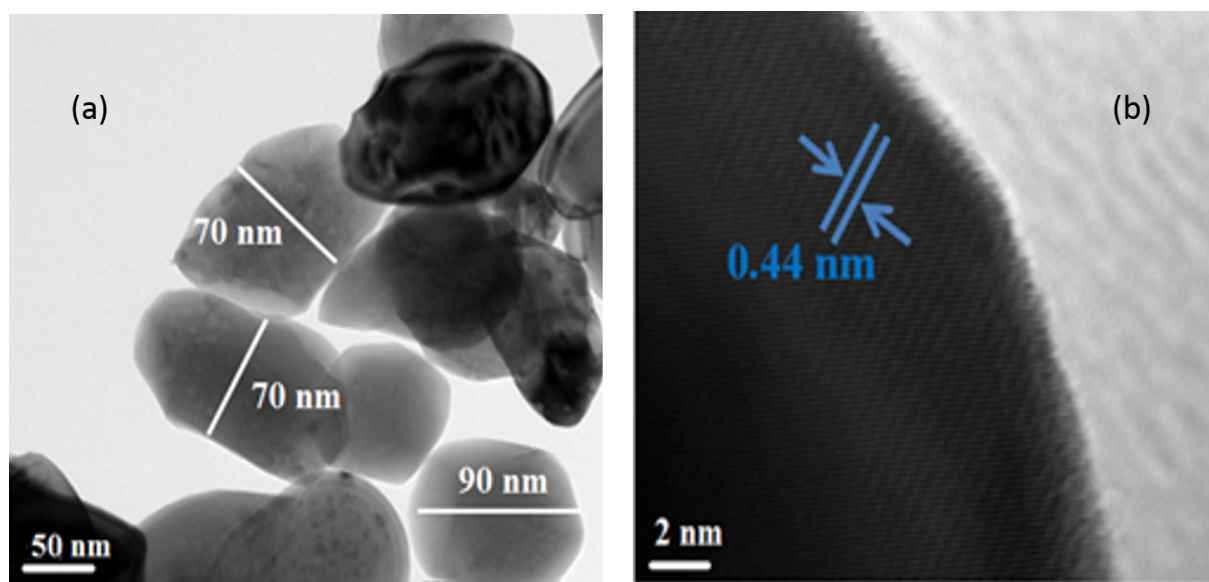

**Figure S1.** HRTEM image of ZnO polygonal NPs (a) and its SAED patterns (b)

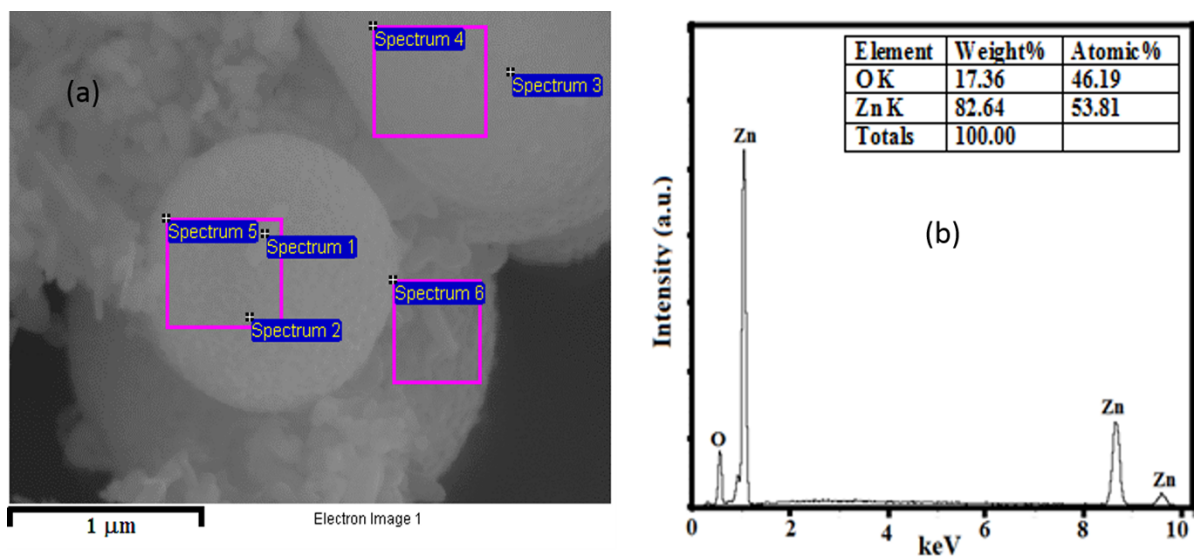

**Figure S2.** (a) FESEM Self assembled ZnO dandelions capsules at low magnification and (b) EDS spectra (free from any trace elements other than elemental zinc and oxygen)

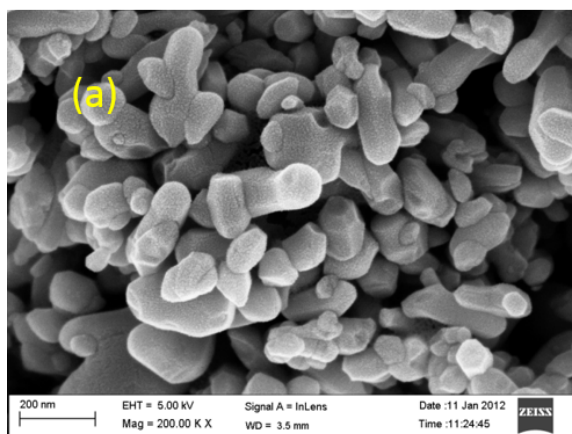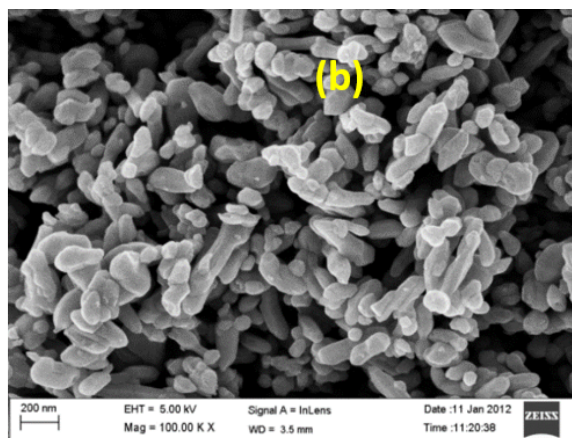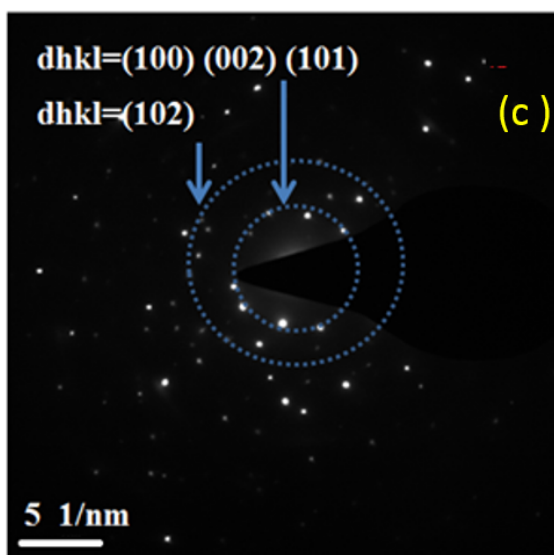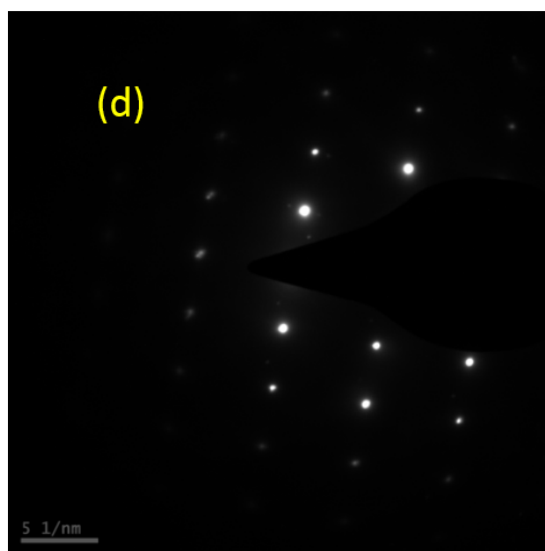

**Figure S3.** ZnO Nanoparticles synthesized at the Igepal CO-520 concentration of 0.25 ml (a) and 0.5 ml (b) and their diffraction patterns (c) and (d), respectively

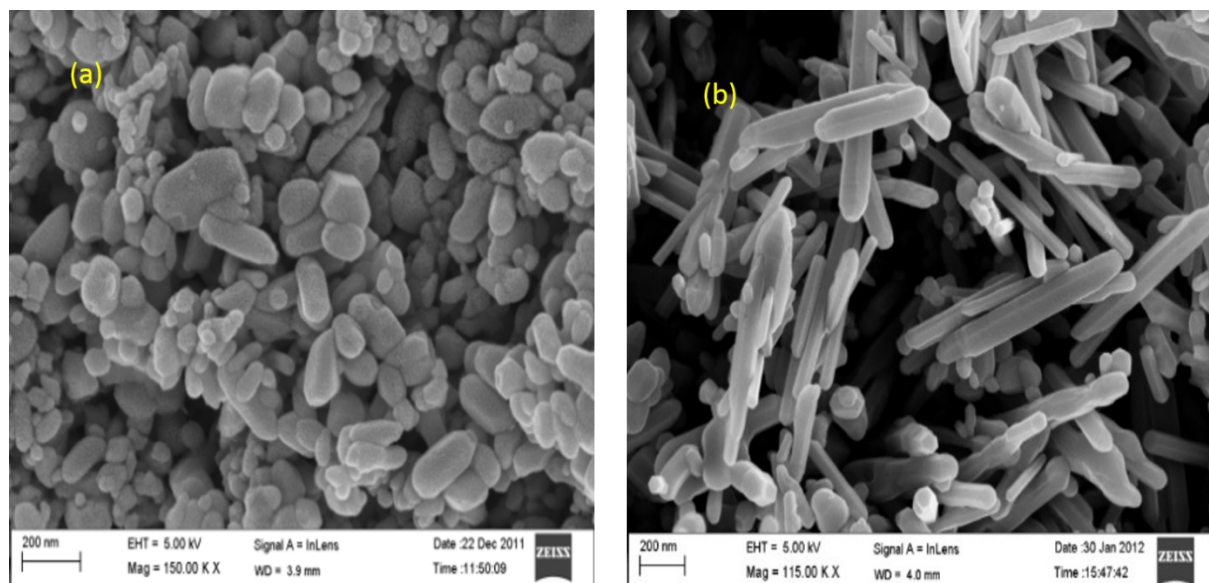

**Figure S4.** The XRD results compared with the ZnO nanoparticles (NPs) (a), and Nano rods (NRs) (b).

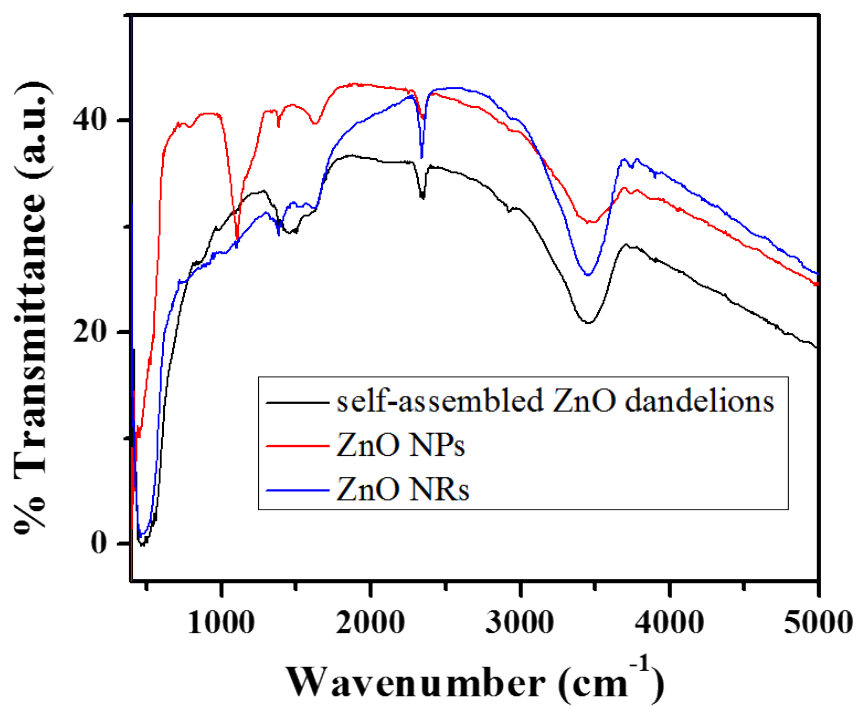

**Figure S5** FTIR spectra for ZnO NPs, ZnO NRs and self-assembled ZnO dandelions

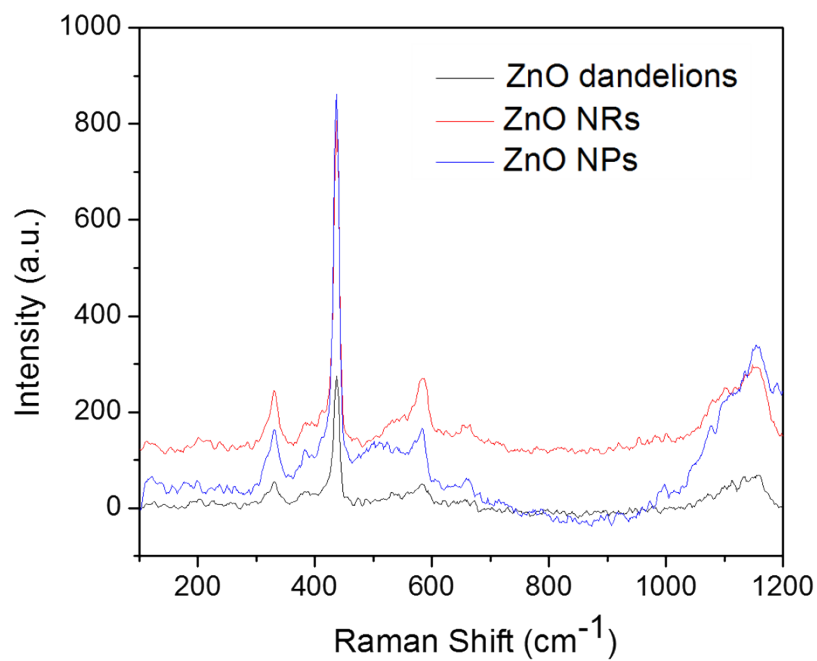

**Figure S6** Raman spectra for ZnO NPs, ZnO NRs and self-assembled ZnO *dandelions*.

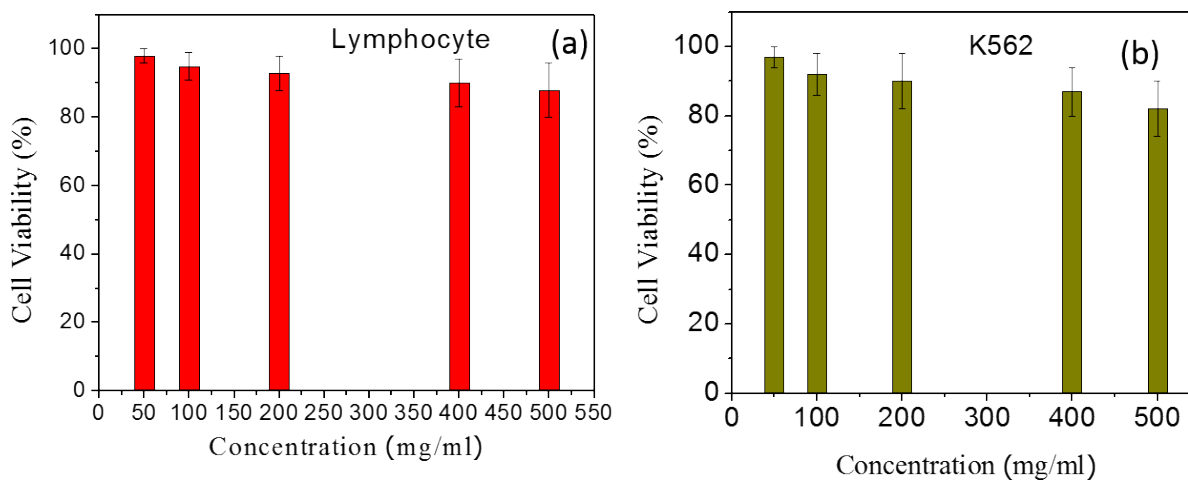

**Figure S7.** Cell viability of dandelions with (a) Lymphocyte cells and with (b) K562 (cancer cells)

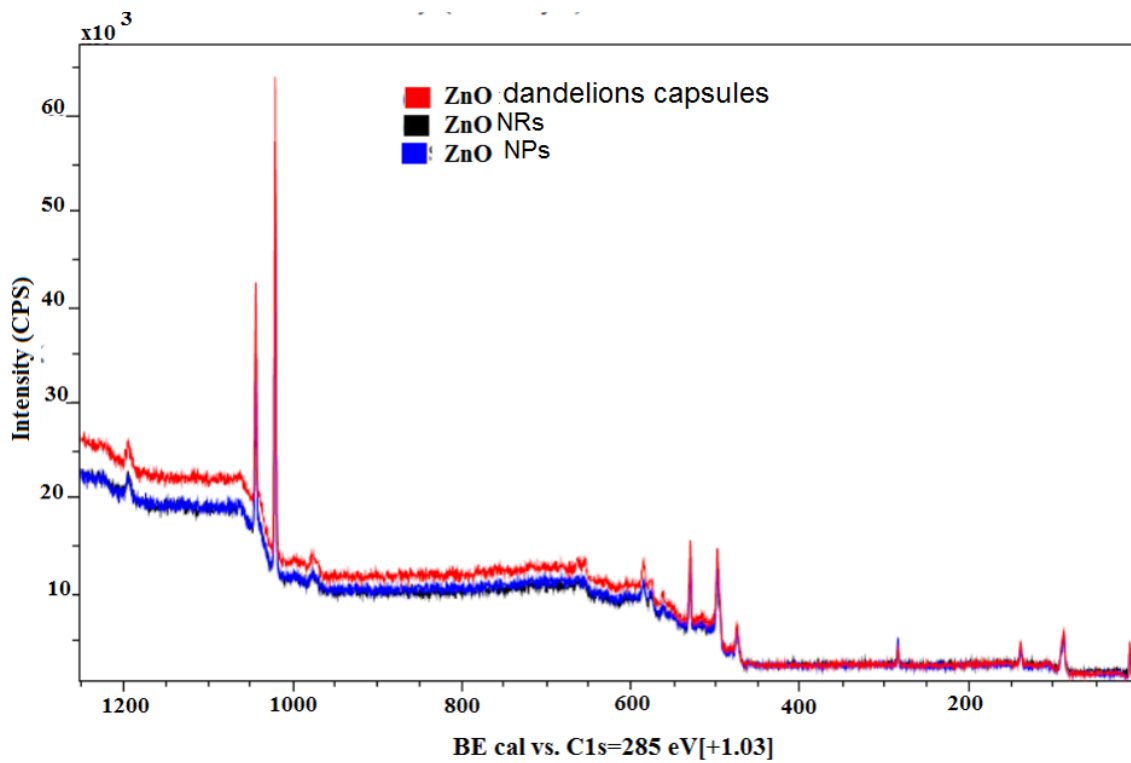

**Figure S8(a)** XPS for self-assembled ZnO dandelions, ZnO NRs and ZnO NPs

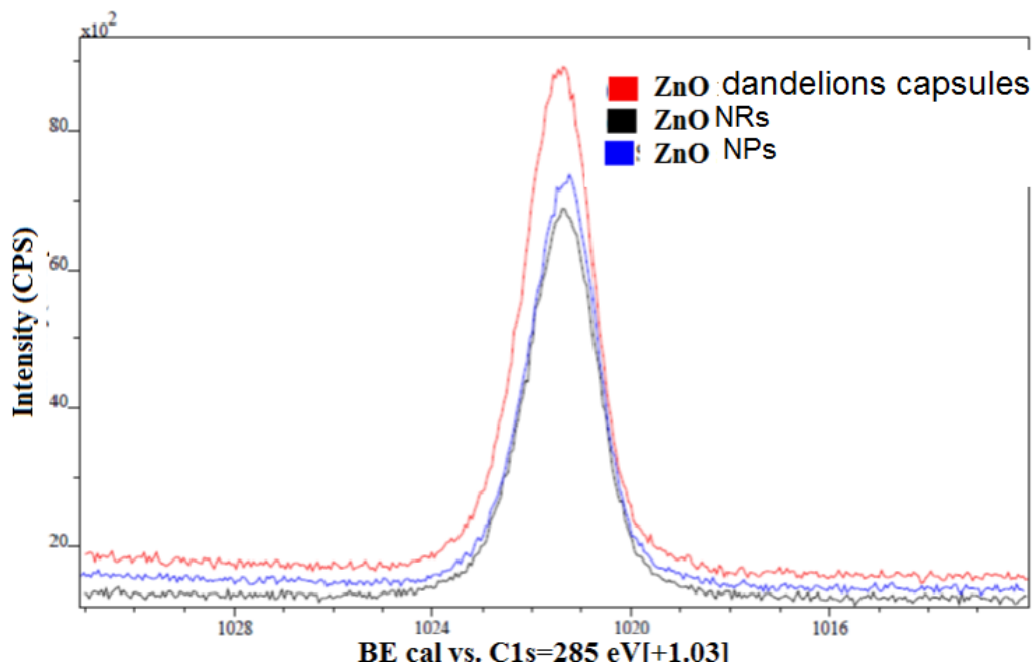

**Figure S8(b)** Zn 2p<sub>3/2</sub> XPS spectra for self-assembled ZnO dandelions, ZnO NRs and ZnO NPs

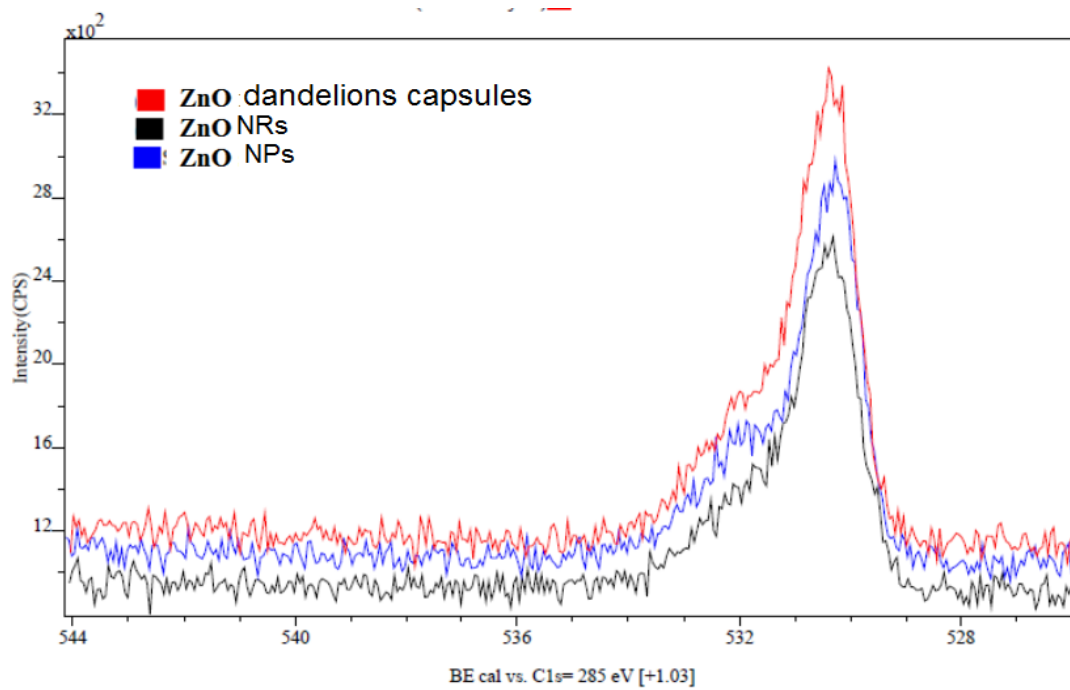

**Figure S8(c)** O 1s, XPS for self-assembled ZnO dandelions, ZnO NRs and ZnO NPs.

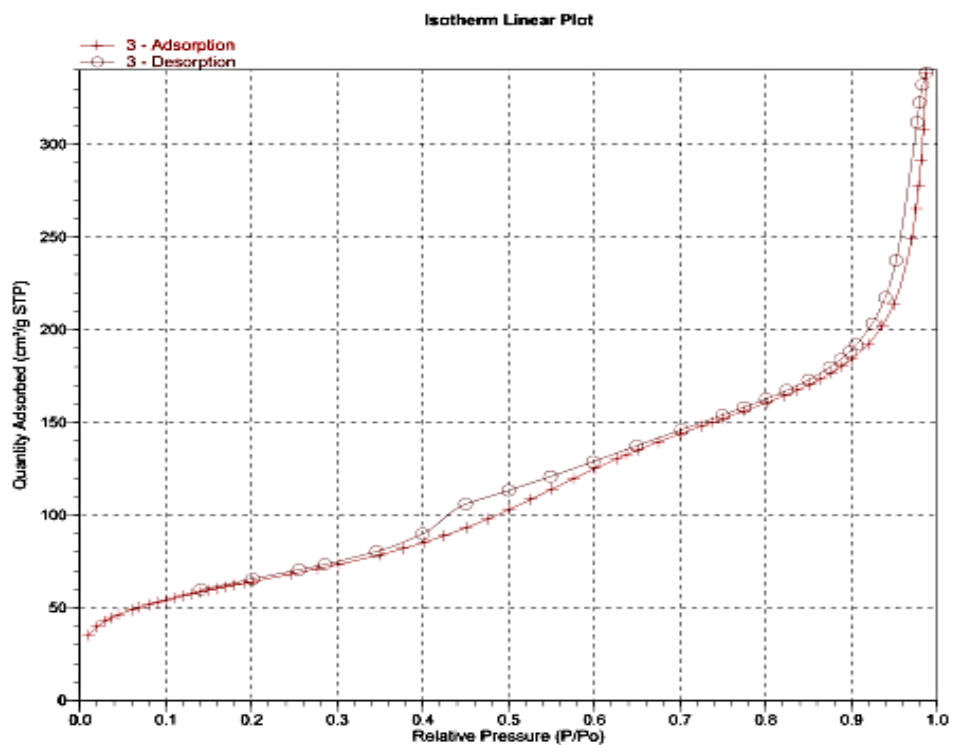

**Figure S9(a)** .  $N_2$  Adsorption-desorption isotherm for ZnO *dandelions*

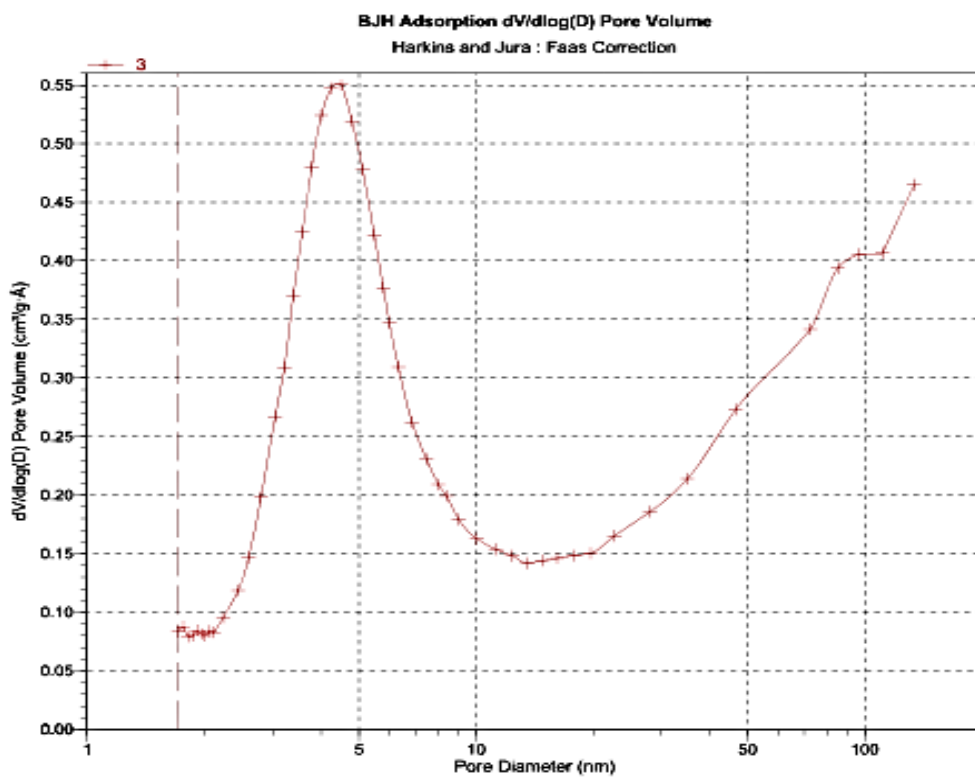

**Figure S9(b)**. Pore size distribution for ZnO *dandelions* calculated from BET analysis
